# Supplementary material for: Natural Populations from the Phytophthora palustris Complex Show a High Diversity and Abundance of ssRNA and dsRNA Viruses
Source: MDPI journal article supplement (doi:10.3390/jof8111118), 2022-10-24
Supplement: s1 [file s1]

## Supplementary tables

**Table S1.** List of '*Phytophthora palustris*' isolates used in the present study.

| Isolate Code | Island | Site   | Latitude  | Longitude  | Ecosystem     | Host          | Collecting year | RNA POOL |
|--------------|--------|--------|-----------|------------|---------------|---------------|-----------------|----------|
| JP1654       | Japan  | JP_F32 | 28.495226 | 129.661421 | Forest stream | Fallen leaves | 2018            | JP 2     |
| JP1201       | Japan  | JP_R31 | 31.82887  | 130.64113  | Forest stream | Fallen leaves | 2018            | JP 1     |
| JP1268       | Japan  | JP_R35 | 28.39768  | 129.59153  | Forest stream | Fallen leaves | 2018            | JP 1     |
| JP1257       | Japan  | JP_R35 | 28.39768  | 129.59153  | Forest stream | Fallen leaves | 2018            | TW-JP    |
| JP1287       | Japan  | JP_R36 | 28.399477 | 129.591249 | Forest stream | Fallen leaves | 2018            | JP 1     |
| JP1271       | Japan  | JP_R36 | 28.399477 | 129.591249 | Forest stream | Fallen leaves | 2018            | TW-JP    |
| JP1301       | Japan  | JP_R37 | 28.3933   | 129.594529 | Forest stream | Fallen leaves | 2018            | JP 1     |
| JP1319       | Japan  | JP_R39 | 28.434254 | 129.589337 | Forest stream | Fallen leaves | 2018            | JP 1     |
| JP1321       | Japan  | JP_R40 | 28.495226 | 129.661421 | Forest stream | Fallen leaves | 2018            | JP 1     |
| JP1324       | Japan  | JP_R40 | 28.495226 | 129.661421 | Forest stream | Fallen leaves | 2018            | JP 1     |
| JP1338       | Japan  | JP_R40 | 28.495226 | 129.661421 | Forest stream | Fallen leaves | 2018            | TW-JP    |
| JP1350       | Japan  | JP_R41 | 28.477746 | 129.675774 | Forest stream | Fallen leaves | 2018            | JP 1     |
| JP1355       | Japan  | JP_R42 | 28.329501 | 129.481019 | Forest stream | Fallen leaves | 2018            | TW-JP    |
| JP1362       | Japan  | JP_R43 | 28.289778 | 129.434379 | Forest stream | Fallen leaves | 2018            | JP 1     |
| JP1370       | Japan  | JP_R44 | 28.22532  | 129.368641 | Forest stream | Fallen leaves | 2018            | JP 2     |
| JP1379       | Japan  | JP_R44 | 28.22532  | 129.368641 | Forest stream | Fallen leaves | 2018            | JP 2     |

| Isolate Code | Island     | Site   | Latitude  | Longitude  | Ecosystem     | Host          | Collecting year | RNA POOL |
|--------------|------------|--------|-----------|------------|---------------|---------------|-----------------|----------|
| JP1389       | Japan      | JP_R46 | 28.377835 | 129.458181 | Forest stream | Fallen leaves | 2018            | JP 2     |
| JP1509       | Japan      | JP_R47 | 26.58825  | 128.006573 | Forest stream | Fallen leaves | 2018            | JP 2     |
| JP1511       | Japan      | JP_R47 | 26.58825  | 128.006573 | Forest stream | Fallen leaves | 2018            | JP 2     |
| JP1523       | Japan      | JP_R48 | 26.759784 | 128.218436 | Forest stream | Fallen leaves | 2018            | TW-JP    |
| JP1533       | Japan      | JP_R49 | 26.759506 | 128.216925 | Forest stream | Fallen leaves | 2018            | JP 2     |
| JP1534       | Japan      | JP_R49 | 26.759506 | 128.216925 | Forest stream | Fallen leaves | 2018            | JP 2     |
| JP1566       | Japan      | JP_R50 | 26.509577 | 127.904906 | Forest stream | Fallen leaves | 2018            | JP 2     |
| JP1543       | Japan      | JP_R50 | 26.509577 | 127.904906 | Forest stream | Fallen leaves | 2018            | TW-JP    |
| JP1564       | Japan      | JP_R50 | 26.509577 | 127.904906 | Forest stream | Fallen leaves | 2018            | TW-JP    |
| KA0033       | Kalimantan | KA_F13 | 0.88671   | 116.66049  | Forest stream | Fallen leaves | 2019            | KA 3     |
| KA0044       | Kalimantan | KA_R03 | 4.06809   | 117.16497  | River         | Fallen leaves | 2019            | KA 1     |
| KA0085       | Kalimantan | KA_R03 | 4.06809   | 117.16497  | River         | Fallen leaves | 2019            | KA 1     |
| KA0093       | Kalimantan | KA_R03 | 4.06809   | 117.16497  | River         | Fallen leaves | 2019            | KA 1     |
| KA0046       | Kalimantan | KA_R03 | 4.06809   | 117.16497  | River         | Fallen leaves | 2019            | KA 2     |
| KA0052       | Kalimantan | KA_R03 | 4.06809   | 117.16497  | River         | Fallen leaves | 2019            | KA 2     |
| KA0059       | Kalimantan | KA_R03 | 4.06809   | 117.16497  | River         | Fallen leaves | 2019            | KA 2     |
| KA0081       | Kalimantan | KA_R03 | 4.06809   | 117.16497  | River         | Fallen leaves | 2019            | KA 2     |
| KA0092       | Kalimantan | KA_R03 | 4.06809   | 117.16497  | River         | Fallen leaves | 2019            | KA 2     |
| KA0106       | Kalimantan | KA_R05 | 4.04382   | 117.043776 | River         | Fallen leaves | 2019            | KA 1     |
| KA0109       | Kalimantan | KA_R05 | 4.04382   | 117.043776 | River         | Fallen leaves | 2019            | KA 1     |
| KA0110       | Kalimantan | KA_R05 | 4.04382   | 117.043776 | River         | Fallen leaves | 2019            | KA 1     |
| KA0127       | Kalimantan | KA_R05 | 4.04382   | 117.043776 | River         | Fallen leaves | 2019            | KA 1     |
| KA0129       | Kalimantan | KA_R05 | 4.04382   | 117.043776 | River         | Fallen leaves | 2019            | KA 1     |
| KA0101       | Kalimantan | KA_R05 | 4.04382   | 117.043776 | River         | Fallen leaves | 2019            | KA 2     |
| KA0102       | Kalimantan | KA_R05 | 4.04382   | 117.043776 | River         | Fallen leaves | 2019            | KA 2     |
| KA0116       | Kalimantan | KA_R05 | 4.04382   | 117.043776 | River         | Fallen leaves | 2019            | KA 2     |
| KA0119       | Kalimantan | KA_R05 | 4.04382   | 117.043776 | River         | Fallen leaves | 2019            | KA 2     |
| KA0120       | Kalimantan | KA_R05 | 4.04382   | 117.043776 | River         | Fallen leaves | 2019            | KA 2     |
| KA0134       | Kalimantan | KA_R06 | 3.82856   | 116.79734  | River         | Fallen leaves | 2019            | KA 1     |
| KA0139       | Kalimantan | KA_R06 | 3.82856   | 116.79734  | River         | Fallen leaves | 2019            | KA 1     |

| Isolate Code | Island     | Site   | Latitude | Longitude  | Ecosystem       | Host                 | Collecting year | RNA POOL |
|--------------|------------|--------|----------|------------|-----------------|----------------------|-----------------|----------|
| KA0142       | Kalimantan | KA_R06 | 3.82856  | 116.79734  | River           | Fallen leaves        | 2019            | KA 1     |
| KA0146       | Kalimantan | KA_R06 | 3.82856  | 116.79734  | River           | Fallen leaves        | 2019            | KA 3     |
| KA0147       | Kalimantan | KA_R06 | 3.82856  | 116.79734  | River           | Fallen leaves        | 2019            | KA 3     |
| KA0152       | Kalimantan | KA_R06 | 3.82856  | 116.79734  | River           | Fallen leaves        | 2019            | KA 3     |
| KA0156       | Kalimantan | KA_R06 | 3.82856  | 116.79734  | River           | Fallen leaves        | 2019            | KA 3     |
| KA0167       | Kalimantan | KA_R06 | 3.82856  | 116.79734  | River           | Fallen leaves        | 2019            | KA 3     |
| KA0170       | Kalimantan | KA_R06 | 3.82856  | 116.79734  | River           | Fallen leaves        | 2019            | KA 3     |
| KA0187       | Kalimantan | KA_R08 | 4.06809  | 117.16497  | River           | Fallen leaves        | 2019            | KA 3     |
| KA0189       | Kalimantan | KA_R09 | 3.37549  | 117.04230  | River           | Fallen leaves        | 2019            | KA 1     |
| SU0835       | Sumatra    | SU_F11 | 0.08716  | 101.43640  | Forest soil     | Fallen leaves        | 2018            | SU 4     |
| SU0839       | Sumatra    | SU_F11 | 0.08716  | 101.43640  | Forest soil     | Fallen leaves        | 2018            | SU 4     |
| SU0875       | Sumatra    | SU_F17 | -0.35439 | 101.80882  | Forest soil     | Baiting              | 2018            | SU 1     |
| SU0982       | Sumatra    | SU_F24 | 2.233063 | 99.204049  | Forest soil     | Baiting              | 2018            | SU 1     |
| SU0987       | Sumatra    | SU_F25 | 2.233063 | 99.204049  | Forest soil     | Baiting              | 2018            | SU 1     |
| SU0777       | Sumatra    | SU_F40 | -0.59987 | 100.10982  | Mangrove        | Fallen leaves        | 2018            | SU 1     |
| SU1361       | Sumatra    | SU_F42 | 0.8711   | 102.34687  | Mangrove        | Fallen leaves in sea | 2018            | SU 4     |
| SU1370       | Sumatra    | SU_F42 | 0.8711   | 102.34687  | Mangrove        | Fallen leaves in sea | 2018            | SU 4     |
| SU1477       | Sumatra    | SU_N41 | 0.421098 | 101.865788 | Pond in nursery | Fallen leaves        | 2018            | SU 1     |
| SU1474       | Sumatra    | SU_N41 | 0.421098 | 101.865788 | Pond in nursery | Fallen leaves        | 2018            | SU 1     |
| SU1452       | Sumatra    | SU_N41 | 0.421098 | 101.865788 | Nursery ditch   | Fallen leaves        | 2018            | SU 4     |
| SU0235       | Sumatra    | SU_R01 | 0.03625  | 101.40635  | River           | Fallen leaves        | 2018            | SU 1     |
| SU0245bTRUE  | Sumatra    | SU_R02 | 0.04794  | 101.41029  | River           | Fallen leaves        | 2018            | SU 1     |
| SU0249       | Sumatra    | SU_R02 | 0.04794  | 101.41029  | River           | Fallen leaves        | 2018            | SU 1     |
| SU0246       | Sumatra    | SU_R02 | 0.04794  | 101.41029  | River           | Fallen leaves        | 2018            | SU 4     |
| SU0015       | Sumatra    | SU_R03 | 0.02641  | 101.45221  | River           | Fallen leaves        | 2018            | SU 1     |
| SU0250       | Sumatra    | SU_R03 | 0.02641  | 101.45221  | River           | Fallen leaves        | 2018            | SU 1     |
| SU0264       | Sumatra    | SU_R03 | 0.02641  | 101.45221  | River           | Fallen leaves        | 2018            | SU 1     |
| SU0019       | Sumatra    | SU_R04 | 0.02072  | 101.44307  | River           | Fallen leaves        | 2018            | SU 2     |
| SU0274       | Sumatra    | SU_R05 | 0.01545  | 101.50026  | River           | Fallen leaves        | 2018            | SU 4     |
| SU0281       | Sumatra    | SU_R05 | 0.01545  | 101.50026  | River           | Fallen leaves        | 2018            | SU 4     |

| Isolate Code | Island  | Site   | Latitude | Longitude | Ecosystem | Host          | Collecting year | RNA POOL |
|--------------|---------|--------|----------|-----------|-----------|---------------|-----------------|----------|
| SU0043       | Sumatra | SU_R06 | 0.02612  | 101.49284 | River     | Fallen leaves | 2018            | SU 2     |
| SU0302       | Sumatra | SU_R06 | 0.02612  | 101.49284 | River     | Fallen leaves | 2018            | SU 2     |
| SU0046       | Sumatra | SU_R07 | 0.10733  | 101.46314 | River     | Fallen leaves | 2018            | SU 2     |
| SU0315       | Sumatra | SU_R07 | 0.10733  | 101.46314 | River     | Fallen leaves | 2018            | SU 2     |
| SU0317       | Sumatra | SU_R07 | 0.10733  | 101.46314 | River     | Fallen leaves | 2018            | SU 2     |
| SU0064       | Sumatra | SU_R08 | 0.10847  | 101.48398 | River     | Fallen leaves | 2018            | SU 2     |
| SU0072       | Sumatra | SU_R08 | 0.10847  | 101.48398 | River     | Fallen leaves | 2018            | SU 2     |
| SU0318       | Sumatra | SU_R08 | 0.10847  | 101.48398 | River     | Fallen leaves | 2018            | SU 2     |
| SU0394       | Sumatra | SU_R08 | 0.10847  | 101.48398 | River     | Fallen leaves | 2018            | SU 2     |
| SU0063       | Sumatra | SU_R09 | 0.09567  | 101.39207 | River     | Fallen leaves | 2018            | SU 2     |
| SU0326       | Sumatra | SU_R09 | 0.09567  | 101.39207 | River     | Fallen leaves | 2018            | SU 2     |
| SU0399       | Sumatra | SU_R10 | 0.07649  | 101.39411 | River     | Fallen leaves | 2018            | SU 4     |
| SU0344       | Sumatra | SU_R11 | 0.08716  | 101.43640 | River     | Fallen leaves | 2018            | SU 3     |
| SU0401       | Sumatra | SU_R11 | 0.08716  | 101.43640 | River     | Fallen leaves | 2018            | SU 3     |
| SU0095       | Sumatra | SU_R12 | 0.09272  | 101.42295 | River     | Fallen leaves | 2018            | SU 3     |
| SU0098       | Sumatra | SU_R12 | 0.09272  | 101.42295 | River     | Fallen leaves | 2018            | SU 4     |
| SU0353       | Sumatra | SU_R13 | -0.35095 | 101.81692 | River     | Fallen leaves | 2018            | SU 4     |
| SU0135       | Sumatra | SU_R14 | -0.34706 | 101.82067 | River     | Fallen leaves | 2018            | SU 3     |
| SU0141       | Sumatra | SU_R14 | -0.34706 | 101.82067 | River     | Fallen leaves | 2018            | SU 4     |
| SU0409       | Sumatra | SU_R14 | -0.34706 | 101.82067 | River     | Fallen leaves | 2018            | SU 4     |
| SU0158       | Sumatra | SU_R15 | -0.37647 | 101.86426 | River     | Fallen leaves | 2018            | SU 3     |
| SU0160       | Sumatra | SU_R15 | -0.37647 | 101.86426 | River     | Fallen leaves | 2018            | SU 3     |
| SU0361bTRUE  | Sumatra | SU_R15 | -0.37647 | 101.86426 | River     | Fallen leaves | 2018            | SU 3     |
| SU0411       | Sumatra | SU_R16 | -0.35697 | 101.84584 | River     | Fallen leaves | 2018            | SU 3     |
| SU0376       | Sumatra | SU_R17 | -0.35439 | 101.80882 | River     | Fallen leaves | 2018            | SU 3     |
| SU0531       | Sumatra | SU_R24 | 2.23306  | 99.20444  | River     | Fallen leaves | 2018            | SU 3     |
| SU0575       | Sumatra | SU_R26 | 2.279201 | 99.189692 | River     | Fallen leaves | 2018            | SU 3     |
| SU0612       | Sumatra | SU_R29 | 2.711036 | 99.002634 | River     | Fallen leaves | 2018            | SU 4     |
| SU0618       | Sumatra | SU_R30 | 2.73353  | 99.045591 | River     | Fallen leaves | 2018            | SU 3     |
| SU0656       | Sumatra | SU_R34 | 0.94306  | 100.52000 | River     | Fallen leaves | 2018            | SU 3     |

| Isolate Code | Island  | Site   | Latitude | Longitude | Ecosystem         | Host                     | Collecting year | RNA POOL |
|--------------|---------|--------|----------|-----------|-------------------|--------------------------|-----------------|----------|
| SU0696       | Sumatra | SU_R38 | 0.09139  | 100.69667 | River             | Fallen leaves            | 2018            | SU 3     |
| TW436        | Taiwan  | TW_F22 | 2.215452 | 120.83867 | Forest Swamp soil | <i>Glochidion rubrum</i> | 2013            | TW-JP    |
| TW437        | Taiwan  | TW_F22 | 2.215452 | 120.83868 | Forest Swamp soil | <i>Glochidion rubrum</i> | 2013            | TW-JP    |
| TW438        | Taiwan  | TW_F22 | 2.215452 | 120.83869 | Forest Swamp soil | <i>Glochidion rubrum</i> | 2013            | TW-JP    |
| TW439        | Taiwan  | TW_F22 | 2.215452 | 120.83870 | Forest Swamp soil | <i>Glochidion rubrum</i> | 2013            | TW-JP    |
| TW440        | Taiwan  | TW_F22 | 2.215452 | 116.79734 | Forest Swamp soil | <i>Glochidion rubrum</i> | 2013            | TW-JP    |

Collectors of the isolates:

Taiwan - T. Jung, M. Horta Jung, C.-H. Fu, K.-L. Hsueh and T.-T. Chang.

Kalimantan - T. Jung, M. Horta Jung and M. Tarigan.

Sumatra - T. Jung, I. Milenkovic, T. Corcobado, L. Oliveira and M. Tarigan.

Japan - T. Jung, M. Horta Jung, C.M. Brasier, J.F. Webber, K. Kageyama, A.

Hieno, H. Masuya and S. Uematsu.

**Table S2.** Primers used for the confirmation of each virus presence in the collection of '*Phytophthora palustris*' isolates by RT-PCR

| Acronym           | Name          | Sequence                  | Tm   |
|-------------------|---------------|---------------------------|------|
| <b>PpaBbLV1-1</b> | BOTY1_SU_FW   | GTGGTACGAAGAATACTCCGCTTA  | 60.2 |
|                   | BOTY1_SU_RE   | TACGCCAAATTGAGTACTGTGTTG  | 59.8 |
| <b>PpaBbVL1-2</b> | BOTY2_SU_FW   | GAAAATAAGGACTTAAGACGCCGG  | 60.0 |
|                   | BOTY2_SU_RE   | CCTCAGTGATACGCATATTCCTT   | 60.3 |
| <b>PpaBbVL1-3</b> | BOTY3_SU_FW   | CTCTTAAATACGATGCGCTACCAC  | 59.9 |
|                   | BOTY3_SU_RE   | GGAGCCTCTTCTGTTGAACTAGA   | 60.0 |
| <b>PpaBbLV2</b>   | BOTY_KA_RE    | CGAACGTGTATCTGACCAAAGAG   | 59.9 |
|                   | BOTY_KA_FW    | TTTTATGGCTACAAAAGAAGGGGC  | 59.8 |
| <b>PpaBbLV2</b>   | BOTY2_RACE    | ATCGCAGTCTTCTCCACCAGGTCGG | 68.0 |
| <b>PpaBLV1</b>    | SU_BUNYA1_FW  | CGTTCCACCCATAGTAAGCATCT   | 60.2 |
|                   | SU_BUNYA1_RE  | AGATGGGTTATGGATTGCAGGAG   | 60.2 |
| <b>PpaBLV2</b>    | SU_BUNYA2_FW  | ACTTAACTCTTCCGATGGCTGT    | 60.0 |
|                   | SU_BUNYA2_RE  | ACAAATGTGATGGAAATGGCTGA   | 59.2 |
| <b>PpaBLV3</b>    | SU_BUNYA3_FW  | ATGAGTGTGTCATGGGCAATAGGTT | 60.1 |
|                   | SU_BUNYA3_RE  | TACAATTTGACAAAGTTGGTGGC   | 60.0 |
| <b>PpaBLV4</b>    | SU_BUNYA4_FW  | CACAGGGACACAGGTTTTGATTC   | 60.0 |
|                   | SU_BUNYA4_RE  | GACACAACACCTTTGCTTACCTC   | 60.0 |
| <b>PpaBLV5</b>    | SU_BUNYA5_FW  | GAAGCATCTCTGGCATCATTTCC   | 60.0 |
|                   | SU_BUNYA5_RE  | AAGATATCAAATCCGCAAAGCCG   | 60.0 |
| <b>PpaBLV6</b>    | SU_BUNYA6_FW  | AAGCACTGATCTAAGGCACTCAA   | 60.0 |
|                   | SU_BUNYA6_RE  | GGCAGGCAGACACATCATAATTC   | 60.0 |
| <b>PpaBLV7</b>    | SU_BUNYA7_FW  | CGATTAACTCGCGACAAAATTCC   | 59.5 |
|                   | SU_BUNYA7_RE  | TACCGAGCGAGATTGAAAGTGAA   | 60.1 |
| <b>PpaBLV8</b>    | SU_BUNYA8_FW  | TCATTGCCTAGTTTACAGTTTTCT  | 56.5 |
|                   | SU_BUNYA8_RE  | ATGTCATTGAGATGATAGTGCCA   | 57.7 |
| <b>PpaBLV9-1</b>  | SU_BUNYA9_FW  | CTTCGATGTAATCCGGGCTTTTC   | 60.0 |
|                   | SU_BUNYA9_RE  | GAGCGGAAATGAGATGTTACTGC   | 60.0 |
| <b>PpaBLV9-2</b>  | SU_BUNYA11_RE | TTCAGTGGCATCTATGGACAGTT   | 59.7 |
|                   | SU_BUNYA11_FW | ATGAAGCTCCAAATTAGGGCGAT   | 60.4 |
| <b>PpaBLV9-3</b>  | SU_BUNYA12_FW | GTTGACCTTGTTTAGAACACCGG   | 60.0 |
|                   | SU_BUNYA12_RE | CTTGTCGAATTCACCGTGTCAA    | 60.0 |
| <b>PpaBLV10</b>   | SU_BUNYA10_FW | TCGAACACGTTAAGGTGAGACAT   | 60.0 |
|                   | SU_BUNYA10_RE | CGAGCAGGCTGATTTTCAATTAAGG | 60.0 |
| <b>PpaBLV11</b>   | SU_BUNYA13_FW | TCATGACGCTAGATCCGTTTTCT   | 59.9 |
|                   | SU_BUNYA13_RE | AGTGTGTTGAACTTAGTCAGCAA   | 58.5 |
| <b>PpaBLV11</b>   | SU_BUNYA14_FW | AACACCTCTCTGAAGAGCGAAAT   | 60.0 |
|                   | SU_BUNYA14_RE | TCTGCCAGCTCTTGTTTTCAATG   | 60.0 |

| Acronym    | Name             | Sequence                    | Tm   |
|------------|------------------|-----------------------------|------|
| PpaBLV11   | NP_Bunya_FW      | GTTGCCTTCCCACGACAAAC        | 60.0 |
|            | NP_BUNYA_RE      | ACTTGTTCATGAGCACGAGCA       | 60.0 |
| PpaBLV11   | Bunya 11_1,033 F | CCTGATAATATACTTCGTGACTGTCCT | 60.0 |
| PpaBLV12   | KA_BUNYA1_FW     | CATCAGCCTTTCATGCAGAGATG     | 60.0 |
|            | KA_BUNYA1_RE     | CTCACTTGAATGTATTCGACGGC     | 60.0 |
| PpaBLV13-1 | KA_BUNYA2_FW     | GACGTAAACTTTGGAACACAGG      | 60.0 |
|            | KA_BUNYA2_RE     | AGCGAACAGACTACTAGTGCAAA     | 60.0 |
| PpaBLV13-2 | KA_BUNYA3_RE     | GAGACCTTTTCGCATGTTCAAA      | 60.0 |
|            | KA_BUNYA3_FW     | TCCTCTCTTTTCGTCATCCATGA     | 59.2 |
| PpaBLV13-3 | KA_BUNYA4_RE     | GCTCACTTTTCGCTTCCTAATGTC    | 59.9 |
|            | KA_BUNYA4_FW     | TCCCTTCATCATCTACCTGTGAA     | 58.6 |
| PpaNLV1    | SU_NARNA1_FW     | CTCGGGAAAAGTTTACACGTGAC     | 60.1 |
|            | SU_NARNA1_RE     | ACCTTGTATCCAAAGCGATTCT      | 60.1 |
| PpaNLV2    | SU_NARNA2_FW     | CTGATGGCTCAATCGAACACATC     | 60.0 |
|            | SU_NARNA2_RE     | GTCGTGACTATCTTACGCAGGAT     | 60.0 |
| PpaNLV3    | SU_NARNA3_RE     | CAGCATAGTTCCACTCTGTCTC      | 60.1 |
|            | SU_NARNA3_FW     | GCGTATTCTGCGAGCAACTAGTAG    | 61.1 |
| PpaNLV4    | SU_NARNA4_FW     | TCCATCTCCACTAATTGTTTCGCA    | 60.1 |
|            | SU_NARNA4_RE     | TATCAGCGAACGACGAATGGTAT     | 60.0 |
| PpaNLV5    | SU_NARNA5_FW     | GAGGACCTTGGGCTAAAGATCAA     | 60.1 |
|            | SU_NARNA5_RE     | GAGGTTGGTGGATTCTGAGACTT     | 60.0 |
| PpaNLV8    | KA_NARNA3_FW     | AGCAAAGAGACGTTTCCTGAAGAT    | 60.0 |
|            | KA_NARNA3_RE     | AGTGCAAGCCAATGTCTTCAATC     | 60.1 |
| PpaNLV7    | KA_NARNA1_FW     | CCGATGATGGTGGAAAATGGATG     | 60.0 |
|            | KA_NARNA1_RE     | GGTTAAACCAGACTGCAAACCTCC    | 60.0 |
| PpaNLV6    | SU_NARNA10_FW    | TGGCGGTGTTATCATATAGGTGG     | 60.0 |
|            | SU_NARNA10_RE    | TCGAAAACCAATGATTGCGTTCA     | 60.0 |
| PpaTLV1-1  | KA_TOTI1_FW      | GAAAAACTTTCCAACGACGGGAT     | 60.0 |
|            | KA_TOTI1_RE      | GCTGTTAATGAATGTCGTAGCCC     | 60.0 |
| PpaTLV1-2  | KA_TOTI4_FW      | AGCTTGAACATGGAAAAAGTCGG     | 60.0 |
|            | KA_TOTI4_RE      | GCTGTTAATGAATGTCGTAGCCC     | 60.0 |
| PpaTLV2-1  | KA_TOTI2_FW      | GCAGAGCGGATAGTTGAACAATC     | 60.0 |
| PpaTLV2-3  | KA_TOTI2_RE      | GCCGAGTGTTGTTTGATCTTGAA     | 60.0 |
| PpaTLV2-2  | KA_TOTI3_FW      | TTCAAGATCAAACAACACTCGGC     | 60.0 |
|            | KA_TOTI3_RE      | ACGCTAGCAAAAAGTCTGGTCTTA    | 60.0 |
| PpaTLV3-1  | KA_TOTI5_FW      | AGGAAAGAGGGCTAACGAAACAT     | 60.0 |
|            | KA_TOTI5_RE      | CGCATCTCATTCGCTTCAATTCT     | 60.0 |
| PpaTLV3-2  | KA_TOTI9_FW      | AAGCCTTTCTGTACAACATGTGC     | 60.0 |
|            | KA_TOTI9_RE      | ACATCGTCCTCGTATACTTCGTG     | 60.0 |
| PpaTL3-3   | SU_TOTI4_FW      | TGTGGCTGTGGATTAAGCAGTAT     | 60.1 |

|            | SU_TOTI4_RE               | AAAGCCAAAGCCTTGTCATTCTC     | 60.0 |
|------------|---------------------------|-----------------------------|------|
| Acronym    | Name                      | Sequence                    | Tm   |
| PpaTLV4    | SU_TOTI5_RE               | AGTAGTGCGCGACATCATAATCT     | 60.0 |
|            | SU_TOTI5_FW               | CCTATGTCTCATCTGGCATGGAA     | 59.9 |
| PpaTLV5-1  | KA_TOTI13_FW              | ATAATGATGTGCTCCACGCCTAT     | 60.0 |
|            | KA_TOTI13_RE              | TTCGACTGGCTTAAGTATGTGCT     | 60.1 |
| PpaTLV5-2  | SU_TOTI1_RE               | ACGTTCGAAACTCTTCACTAGCT     | 60.0 |
|            | SU_TOTI1_FW               | CTGGTGCCATGAACAAAGTCAAT     | 60.0 |
| PpaTLV6    | KA_TOTI6_FW               | CTTATGCGTCTCAATCAATGCGT     | 60.0 |
|            | KA_TOTI6_RE               | TGTGAACGTTATTTGCCTTCACC     | 60.0 |
| PpaTLV7    | KA_TOTI7_FW               | TTCGTATCCTCAGCTTTGGTTCA     | 60.0 |
|            | KA_TOTI7_RE               | TGCCATCGAAAAACAGTGAAGTC     | 60.0 |
| PpaTLV8    | KA_TOTI8_FW               | GGGCTTGGAAGATAAGTCAGTCA     | 60.1 |
|            | KA_TOTI8_RE               | GGGATTCTGATCGAAAAATGGCTG    | 60.0 |
| PpaTLV9    | KA_TOTI10_FW              | GCAGACATTATCCTCCCATTTCG     | 60.0 |
|            | KA_TOTI10_RE              | AACAGCGTTCTCAACTTAGCCTA     | 60.0 |
| PpaTLV10   | KA_TOTI11_FW              | CTGCGTTCAGGAACCTTGTTCAAT    | 60.0 |
|            | KA_TOTI11_RE              | CACAAAGGAGAAAATTGACGGCT     | 60.0 |
| PpaTLV11   | KA_TOTI12_FW              | ACATGCATATCTAGAAGGCTGGG     | 60.0 |
|            | KA_TOTI12_RE              | AATGACCACATTCAGTTGCTTCG     | 60.1 |
| PpaTLV12-1 | KA_TOTI14_FW              | TTGGGGAGCGTTTTGTCTATGTA     | 60.0 |
|            | KA_TOTI14_RE              | GGCTCATCAATCTTACGAAACGG     | 60.0 |
| PpaTLV12-2 | SU_TOTI3_RE               | TAGTTCTGCATTTGGTTGGCTTG     | 60.0 |
|            | SU_TOTI3_FW               | AGTACGGATTGACGGTTGTTACA     | 60.0 |
| PpaTLV12-3 | SU_TOTI3_RE               | TAGTTCTGCATTTGGTTGGCTTG     | 60.0 |
|            | SU_TOTI3_FW               | AGTACGGATTGACGGTTGTTACA     | 60.0 |
| PpaTbLV1   | SU_Tombus_RE              | TCTTCCATGAACAACAAAGCGTC     | 60.0 |
|            | SU_Tombus_FW              | GCCAATGGAAAAGCAGTTTAGGT     | 60.0 |
| PpaBLV11   | RACE_NC_FW                | GAAGTGGCCCTTCGTCCACTTTGCC   | 68.1 |
|            | RACE_NC_RE                | GGCAAAGTGGACGAAGGGGCAGTTC   | 68.1 |
|            | RACE_RDRP_RE              | TGTCGAGCATTTCTCAGCGGCTTC    | 67.4 |
|            | RACE_1,563 RE<br>(RDRP)   | TGGCTTGCCAAGAGGGGACAGAAAGGA | 69.6 |
|            | RACE_5,283 FW<br>(RDRP)   | GCGCTGTGACCACTTCAGGCTCGAACT | 70.6 |
|            | RACE_FW_Bunya11<br>(RDRP) | TGCTTGGCTGTTTTACATCAGACCCC  | 67.6 |
|            |                           |                             |      |



**Table S3.** Trimmed low quality and adaptor data.

| MultiQC Trimmed Data |         |    |             |             |
|----------------------|---------|----|-------------|-------------|
| Sample Name          | Trimmed | GC | Length (bp) | nr Seqs     |
| JP_TW_R1             | 3.80    | 50 | 144         | 234,370,395 |
| JP_TW_R2             | 3.80    | 50 | 144         | 234,370,395 |
| JP1_R1               | 4.30    | 50 | 143         | 288,057,483 |
| JP1_R2               | 4.40    | 50 | 143         | 288,057,483 |
| JP2_R1               | 3.10    | 50 | 145         | 287,382,226 |
| JP2_R2               | 3.30    | 50 | 145         | 287,382,226 |
| SU1_R1               | 4.20    | 50 | 144         | 207,472,787 |
| SU1_R2               | 4.20    | 51 | 143         | 207,472,787 |
| SU2_R1               | 4.30    | 51 | 143         | 236,535,193 |
| SU2_R2               | 4.30    | 51 | 143         | 236,535,193 |
| SU3_R1               | 4.00    | 51 | 144         | 224,042,957 |
| SU3_R2               | 4.00    | 51 | 144         | 224,042,957 |
| SU4_R1               | 3.30    | 48 | 145         | 302,757,825 |
| SU4_R2               | 3.50    | 48 | 145         | 302,757,825 |
| KA1_R1               | 3.90    | 50 | 144         | 221,656,189 |
| KA1_R2               | 3.90    | 50 | 144         | 221,656,189 |
| KA2_R1               | 3.30    | 49 | 145         | 299,814,921 |
| KA2_R2               | 3.40    | 49 | 145         | 299,814,921 |
| KA3_R1               | 2.90    | 49 | 145         | 281,646,551 |
| KA3_R2               | 3.10    | 49 | 145         | 281,646,551 |

**Table S4.** Mapped reads to *Phytophthora parasitica* genome (used as a reference host genome)

| Sample | Total reads | Mapped reads | %     |
|--------|-------------|--------------|-------|
| JP_TW  | 470,718,504 | 445,459,810  | 94.63 |
| JP1    | 578,962,481 | 559,162,219  | 96.58 |
| JP2    | 578,300,676 | 570,165,513  | 98.59 |
| SU1    | 418,527,380 | 406,250,977  | 97.07 |
| SU2    | 476,484,813 | 468,200,656  | 98.26 |
| SU3    | 450,396,585 | 414,409,495  | 92.00 |
| SU4    | 608,477,112 | 598,170,418  | 98.31 |
| KA1    | 445,391,062 | 375,964,538  | 84.41 |
| KA2    | 601,884,640 | 580,362,703  | 96.42 |
| KA3    | 567,968,429 | 519,878,953  | 91.53 |

**Table S5.** Data of the resulting contigs obtained by the *de novo* assembling in each sequenced RNA library

| Assembly                | JP-TW  | JP1    | JP2    | SU1    | SU2    | SU3    | SU4    | KA1    | KA2    | KA3    |
|-------------------------|--------|--------|--------|--------|--------|--------|--------|--------|--------|--------|
| # contigs (>= 0 bp)     | 54,135 | 17,128 | 13,929 | 49,994 | 30,077 | 38,344 | 24,139 | 33,127 | 25,398 | 29,755 |
| # contigs (>= 500 bp)   | 23,901 | 34,873 | 28,483 | 21,391 | 13,670 | 17,625 | 47,458 | 11,927 | 54,143 | 69,139 |
| # contigs (>= 1000 bp)  | 11,348 | 8,037  | 6,909  | 9,050  | 6,140  | 7,970  | 11,957 | 4,455  | 11,109 | 12,397 |
| # contigs (>= 5000 bp)  | 291    | 319    | 312    | 139    | 158    | 178    | 473    | 85     | 391    | 289    |
| # contigs (>= 10000 bp) | 28     | 38     | 33     | 4      | 15     | 18     | 72     | 5      | 72     | 35     |
| # contigs (>= 25000 bp) | 2      | 2      | 2      | 0      | 0      | 1      | 2      | 0      | 0      | 0      |
| # contigs (>= 50000 bp) | 0      | 0      | 0      | 0      | 0      | 0      | 0      | 0      | 0      | 0      |
| N50                     | 1,647  | 1,632  | 1,727  | 1,333  | 1,482  | 1,430  | 1,687  | 1,228  | 1,464  | 1,362  |
| N75                     | 938    | 942    | 999    | 831    | 892    | 881    | 984    | 770    | 879    | 835    |
| L50                     | 5,755  | 3,956  | 3,141  | 5,683  | 3,382  | 4,481  | 5,619  | 3,116  | 6,099  | 7,550  |
| L75                     | 12,203 | 8,673  | 6,912  | 11,642 | 7,164  | 9,374  | 12,184 | 6,542  | 13,240 | 15,928 |
| GC (%)                  | 52.95  | 56.57  | 54.99  | 51.82  | 55.33  | 54.3   | 54.51  | 54.34  | 54.89  | 56.3   |
| <b>Mismatches</b>       |        |        |        |        |        |        |        |        |        |        |
| # N's                   | 6,280  | 34,949 | 35,617 | 8,973  | 9,120  | 9,940  | 54,015 | 4,730  | 37,512 | 41,378 |
| # N's per 100 kbp       | 19.81  | 151.05 | 179.99 | 35.96  | 52.82  | 45.5   | 160.51 | 35.78  | 116.78 | 116.76 |

Pairwise identities of the RdRp nucleotide (**Table S6**) and amino acid (**Table S7**) sequences of '*Phytophthora palustris*' botybirnaviruses

**Table S6**

|           | PpaBbV2 | PpaBbV1-1 | PpaBbV1-2 | PpaBbV1-3 |
|-----------|---------|-----------|-----------|-----------|
| PpaBbV2   |         |           |           |           |
| PpaBbV1-1 | 71.62   |           |           |           |
| PpaBbV1-2 | 72.44   | 83.80     |           |           |
| PpaBbV1-3 | 72.23   | 82.14     | 86.75     |           |

**Table S7**

|           | PpaBbV2 | PpaBbV1-1 | PpaBbV1-2 | PpaBbV1-3 |
|-----------|---------|-----------|-----------|-----------|
| PpaBbV2   |         |           |           |           |
| PpaBbV1-1 | 81.14   |           |           |           |
| PpaBbV1-2 | 81.19   | 92.36     |           |           |
| PpaBbV1-3 | 81.92   | 92.56     | 94.75     |           |

**Table S8.** Pairwise identities of the RdRp amino acid sequences of '*Phytophthora palustris*' bunyaviruses

|                | PpaBL<br>V6 | PpaBL<br>V11 | PpaBL<br>V5 | PpaBL<br>V1 | PpaBLV<br>13-1 | PpaBLV<br>13-2 | PpaBLV<br>13-3 | PpaBL<br>V8 | PpaBL<br>V2 | PpaBL<br>V7 | PpaBLV<br>9-1 | PpaBLV<br>9-3 | PpaBLV<br>9-2 | PpaBL<br>V3 | PpaBL<br>V4 | PpaBL<br>V10 | PpaBL<br>V12 |
|----------------|-------------|--------------|-------------|-------------|----------------|----------------|----------------|-------------|-------------|-------------|---------------|---------------|---------------|-------------|-------------|--------------|--------------|
| PpaBLV<br>6    |             |              |             |             |                |                |                |             |             |             |               |               |               |             |             |              |              |
| PpaBLV<br>11   | 9.59        |              |             |             |                |                |                |             |             |             |               |               |               |             |             |              |              |
| PpaBLV<br>5    | 9.80        | 10.05        |             |             |                |                |                |             |             |             |               |               |               |             |             |              |              |
| PpaBLV<br>1    | 10.24       | 10.19        | 15.94       |             |                |                |                |             |             |             |               |               |               |             |             |              |              |
| PpaBLV<br>13-1 | 10.28       | 10.37        | 15.74       | 81.47       |                |                |                |             |             |             |               |               |               |             |             |              |              |
| PpaBLV<br>13-2 | 10.18       | 10.30        | 15.74       | 81.26       | 92.03          |                |                |             |             |             |               |               |               |             |             |              |              |
| PpaBLV<br>13-3 | 10.34       | 11.06        | 15.60       | 83.71       | 92.70          | 99.62          |                |             |             |             |               |               |               |             |             |              |              |
| PpaBLV<br>8    | 9.36        | 9.64         | 15.17       | 28.29       | 28.54          | 28.57          | 31.71          |             |             |             |               |               |               |             |             |              |              |
| PpaBLV<br>2    | 10.77       | 12.15        | 18.33       | 33.98       | 34.12          | 33.70          | 33.70          | 59.12       |             |             |               |               |               |             |             |              |              |
| PpaBLV<br>7    | 9.80        | 11.06        | 16.62       | 30.56       | 30.33          | 30.30          | 32.00          | 50.75       | 87.42       |             |               |               |               |             |             |              |              |
| PpaBLV<br>9-1  | 9.47        | 11.13        | 16.61       | 29.79       | 29.96          | 29.54          | 32.03          | 51.03       | 87.60       | 86.52       |               |               |               |             |             |              |              |
| PpaBLV<br>9-3  | 10.07       | 11.43        | 16.79       | 30.30       | 30.46          | 30.23          | 32.11          | 51.63       | 87.60       | 88.50       | 94.27         |               |               |             |             |              |              |
| PpaBLV<br>9-2  | 9.76        | 11.21        | 16.40       | 29.68       | 29.74          | 29.61          | 31.96          | 50.62       | 87.65       | 86.49       | 90.85         | 94.99         |               |             |             |              |              |
| PpaBLV<br>3    | 9.72        | 10.33        | 15.23       | 27.49       | 27.71          | 27.37          | 29.30          | 32.17       | 37.00       | 33.48       | 33.13         | 34.09         | 33.43         |             |             |              |              |

|              |      |       |       |       |       |       |       |       |       |       |       |       |       |       |       |       |  |  |
|--------------|------|-------|-------|-------|-------|-------|-------|-------|-------|-------|-------|-------|-------|-------|-------|-------|--|--|
| PpaBLV<br>4  | 9.75 | 10.60 | 15.10 | 27.52 | 27.90 | 27.84 | 29.37 | 32.20 | 36.72 | 32.97 | 32.94 | 33.86 | 33.08 | 89.55 |       |       |  |  |
| PpaBLV<br>10 | 9.85 | 10.65 | 14.85 | 27.05 | 27.45 | 27.45 | 30.99 | 31.31 | 39.69 | 34.97 | 34.77 | 35.47 | 34.79 | 67.60 | 70.54 |       |  |  |
| PpaBLV<br>12 | 9.45 | 10.55 | 16.01 | 29.38 | 29.73 | 29.70 | 31.88 | 34.58 | 40.56 | 35.49 | 35.70 | 36.53 | 35.52 | 76.63 | 77.92 | 73.57 |  |  |

**Table S9.** Pairwise identities of the RdRp nucleotide sequences of '*Phytophthora palustris*' bunyaviruses

|                | PpaB<br>LV1 | PpaBLV<br>13-1 | PpaBLV<br>13-2 | PpaBLV<br>13-3 | PpaB<br>LV2 | PpaB<br>LV7 | PpaBL<br>V9-1 | PpaBL<br>V9-2 | PpaBL<br>V9-3 | PpaB<br>LV8 | PpaB<br>LV8 | PpaB<br>LV3 | PpaB<br>LV4 | PpaBL<br>V10 | PpaBL<br>V12 | PpaBL<br>V11 | PpaB<br>LV5 | PpaB<br>LV6 |
|----------------|-------------|----------------|----------------|----------------|-------------|-------------|---------------|---------------|---------------|-------------|-------------|-------------|-------------|--------------|--------------|--------------|-------------|-------------|
| PpaBLV<br>1    |             |                |                |                |             |             |               |               |               |             |             |             |             |              |              |              |             |             |
| PpaBLV<br>13-1 | 72.90       |                |                |                |             |             |               |               |               |             |             |             |             |              |              |              |             |             |
| PpaBLV<br>13-2 | 72.21       | 82.05          |                |                |             |             |               |               |               |             |             |             |             |              |              |              |             |             |
| PpaBLV<br>13-3 | 72.12       | 81.41          | 99.30          |                |             |             |               |               |               |             |             |             |             |              |              |              |             |             |
| PpaBLV<br>2    | 42.49       | 42.61          | 42.43          | 42.51          |             |             |               |               |               |             |             |             |             |              |              |              |             |             |
| PpaBLV<br>7    | 42.38       | 42.36          | 42.83          | 42.80          | 73.00       |             |               |               |               |             |             |             |             |              |              |              |             |             |
| PpaBLV<br>9-1  | 42.81       | 42.40          | 42.95          | 42.80          | 74.29       | 76.53       |               |               |               |             |             |             |             |              |              |              |             |             |
| PpaBLV<br>9-2  | 42.43       | 42.02          | 42.36          | 42.23          | 73.74       | 75.88       | 79.13         |               |               |             |             |             |             |              |              |              |             |             |
| PpaBLV<br>9-3  | 42.95       | 42.53          | 42.80          | 42.64          | 73.53       | 76.73       | 84.14         | 90.68         |               |             |             |             |             |              |              |              |             |             |
| PpaBLV<br>8    | 41.00       | 40.58          | 41.16          | 41.04          | 53.97       | 53.91       | 53.87         | 53.71         | 54.20         |             |             |             |             |              |              |              |             |             |
| PpaBLV<br>8    | 40.96       | 40.53          | 41.12          | 41.00          | 53.90       | 53.84       | 53.81         | 53.65         | 54.13         | 99.88       |             |             |             |              |              |              |             |             |
| PpaBLV<br>3    | 40.91       | 40.91          | 40.93          | 40.79          | 45.69       | 45.33       | 46.18         | 46.11         | 46.00         | 45.24       | 45.18       |             |             |              |              |              |             |             |

|                  |       |       |       |       |       |       |       |       |       |       |       |       |       |       |       |       |       |  |
|------------------|-------|-------|-------|-------|-------|-------|-------|-------|-------|-------|-------|-------|-------|-------|-------|-------|-------|--|
| <b>PpaBLV 4</b>  | 40.89 | 41.01 | 40.99 | 40.85 | 45.78 | 45.51 | 46.23 | 45.81 | 46.22 | 45.16 | 45.10 | 85.31 |       |       |       |       |       |  |
| <b>PpaBLV 10</b> | 41.15 | 41.18 | 41.70 | 41.58 | 45.35 | 45.12 | 45.73 | 45.22 | 45.85 | 45.44 | 45.38 | 74.34 | 78.47 |       |       |       |       |  |
| <b>PpaBLV 12</b> | 41.12 | 41.18 | 41.53 | 41.63 | 45.51 | 45.54 | 45.84 | 45.54 | 45.62 | 44.89 | 44.84 | 74.51 | 74.98 | 75.37 |       |       |       |  |
| <b>PpaBLV 11</b> | 25.81 | 25.49 | 25.47 | 25.40 | 27.63 | 27.12 | 27.31 | 26.78 | 27.04 | 25.21 | 25.18 | 26.23 | 26.24 | 25.98 | 26.16 |       |       |  |
| <b>PpaBLV 5</b>  | 31.67 | 31.66 | 31.75 | 31.74 | 33.07 | 33.01 | 33.08 | 32.94 | 33.16 | 31.40 | 31.37 | 31.83 | 31.82 | 31.63 | 31.51 | 23.07 |       |  |
| <b>PpaBLV 6</b>  | 23.61 | 23.63 | 23.86 | 23.92 | 24.73 | 24.62 | 24.76 | 24.42 | 24.91 | 23.25 | 23.25 | 24.47 | 24.33 | 24.30 | 24.36 | 21.13 | 21.91 |  |

**Table S10.** Pairwise identities of the RdRp nucleotide sequences of '*Phytophthora palustris*' putative narnaviruses

|                   | <b>PpaNLV1</b> | <b>PpaNLV7</b> | <b>PpaNLV2</b> | <b>PpaNLV5</b> | <b>PpaNLV6</b> | <b>PpaNLV4</b> | <b>PpaNLV8</b> | <b>PpaNLV3- 1</b> | <b>PpaNLV3-2</b> | <b>PpaNLV3- 3</b> |
|-------------------|----------------|----------------|----------------|----------------|----------------|----------------|----------------|-------------------|------------------|-------------------|
| <b>PpaNLV1</b>    |                |                |                |                |                |                |                |                   |                  |                   |
| <b>PpaNLV7</b>    | 27.14          |                |                |                |                |                |                |                   |                  |                   |
| <b>PpaNLV2</b>    | 27.42          | 26.30          |                |                |                |                |                |                   |                  |                   |
| <b>PpaNV5</b>     | 27.67          | 25.93          | 35.14          |                |                |                |                |                   |                  |                   |
| <b>PpaNLV6</b>    | 19.07          | 16.84          | 21.04          | 20.90          |                |                |                |                   |                  |                   |
| <b>PpaNLV4</b>    | 29.49          | 27.90          | 35.01          | 33.98          | 20.30          |                |                |                   |                  |                   |
| <b>PpaNLV8</b>    | 14.81          | 11.91          | 16.78          | 16.67          | 18.11          | 22.30          |                |                   |                  |                   |
| <b>PpaNLV3- 1</b> | 31.68          | 29.11          | 35.64          | 34.62          | 21.08          | 81.48          | 24.17          |                   |                  |                   |
| <b>PpaNLV3- 2</b> | 31.41          | 29.14          | 35.84          | 34.52          | 21.08          | 80.96          | 25.33          | 93.16             |                  |                   |
| <b>PpaNLV3- 3</b> | 31.36          | 29.17          | 35.84          | 34.42          | 20.83          | 80.68          | 25.64          | 92.92             | 99.08            |                   |

\*PpaNLV 6 and 7 have surely partial sequences

**Table S11.** Pairwise identities of the RdRp amino acid sequences of '*Phytophthora palustris*' narnaviruses

|           | PpaNLV6 | PpaNLV8 | PpaNLV4 | PpaNLV3-1 | PpaNLV3-2 | PpaNLV3-3 | PpaNLV2 | PpaNLV5 | PpaNLV1 | PpaNLV7 |
|-----------|---------|---------|---------|-----------|-----------|-----------|---------|---------|---------|---------|
| PpaNLV6   |         |         |         |           |           |           |         |         |         |         |
| PpaNLV8   | 5.44    |         |         |           |           |           |         |         |         |         |
| PpaNLV4   | 8.89    | 33.33   |         |           |           |           |         |         |         |         |
| PpaNLV3-1 | 8.88    | 34.48   | 85.95   |           |           |           |         |         |         |         |
| PpaNLV3-2 | 8.42    | 35.09   | 85.44   | 95.53     |           |           |         |         |         |         |
| PpaNLV3-3 | 8.57    | 35.09   | 84.41   | 94.54     | 99.31     |           |         |         |         |         |
| PpaNLV2   | 8.92    | 15.97   | 22.08   | 21.99     | 22.61     | 21.86     |         |         |         |         |
| PpaNLV5   | 7.21    | 25.38   | 24.38   | 24.38     | 24.26     | 24.38     | 39.02   |         |         |         |
| PpaNLV1   | 8.20    | 9.21    | 12.10   | 12.50     | 12.61     | 12.49     | 11.81   | 7.26    |         |         |
| PpaNV7    | 8.62    | 6.93    | 11.61   | 11.53     | 11.61     | 11.52     | 10.58   | 7.52    | 15.15   |         |

**Table S12.** Pairwise identities of the RdRp nucleotide sequences of '*Phytophthora palustris*' toti-like viruses

[illegible]

|                 |       |       |       |       |       |       |       |       |       |       |       |       |       |       |       |       |       |       |       |  |  |
|-----------------|-------|-------|-------|-------|-------|-------|-------|-------|-------|-------|-------|-------|-------|-------|-------|-------|-------|-------|-------|--|--|
| PpaTL<br>V5-2   | 26.72 | 26.35 | 26.17 | 26.51 | 25.37 | 25.85 | 32.60 | 82.67 |       |       |       |       |       |       |       |       |       |       |       |  |  |
| PpaTL<br>V9     | 26.59 | 26.72 | 26.68 | 25.31 | 25.28 | 24.93 | 31.46 | 34.00 | 33.72 |       |       |       |       |       |       |       |       |       |       |  |  |
| PpaTL<br>V6     | 25.37 | 25.13 | 25.38 | 25.88 | 25.64 | 25.64 | 27.50 | 28.91 | 28.61 | 30.38 |       |       |       |       |       |       |       |       |       |  |  |
| PpaTL<br>V 8    | 22.25 | 21.82 | 22.26 | 21.76 | 21.74 | 21.79 | 22.79 | 24.75 | 24.71 | 24.23 | 25.91 |       |       |       |       |       |       |       |       |  |  |
| PpaTL<br>V 4    | 13.69 | 13.67 | 13.76 | 12.19 | 11.57 | 11.57 | 11.45 | 12.50 | 12.16 | 11.57 | 11.32 | 13.40 |       |       |       |       |       |       |       |  |  |
| PpaTL<br>V7     | 21.88 | 21.60 | 21.58 | 22.01 | 23.92 | 24.29 | 22.38 | 24.61 | 25.03 | 23.54 | 24.39 | 41.33 | 11.69 |       |       |       |       |       |       |  |  |
| PpaTL<br>V2-1   | 29.14 | 28.37 | 28.53 | 27.75 | 27.81 | 27.46 | 34.94 | 37.93 | 37.39 | 35.61 | 33.40 | 26.99 | 13.54 | 25.83 |       |       |       |       |       |  |  |
| PpaTL<br>V2-2   | 29.07 | 28.65 | 29.00 | 28.27 | 27.88 | 27.72 | 35.50 | 38.73 | 37.25 | 36.16 | 33.40 | 27.11 | 14.00 | 26.06 | 84.75 |       |       |       |       |  |  |
| PpaTL<br>V 2- 3 | 29.21 | 28.71 | 28.93 | 28.46 | 28.03 | 27.94 | 35.36 | 38.69 | 37.27 | 36.09 | 33.45 | 27.26 | 14.04 | 26.14 | 84.99 | 96.35 |       |       |       |  |  |
| PpaTL<br>V 11   | 26.20 | 25.23 | 25.77 | 26.19 | 26.16 | 26.21 | 32.87 | 32.65 | 32.76 | 31.88 | 30.32 | 23.50 | 12.06 | 24.14 | 38.28 | 38.38 | 38.48 |       |       |  |  |
| PpaTL<br>V 1-1  | 27.56 | 26.31 | 26.18 | 26.75 | 29.17 | 29.05 | 34.88 | 34.80 | 33.93 | 32.91 | 30.93 | 25.00 | 13.59 | 27.10 | 43.62 | 43.68 | 43.92 | 38.11 |       |  |  |
| PpaTL<br>V1-2   | 27.29 | 26.06 | 25.93 | 26.72 | 29.01 | 28.80 | 34.56 | 34.56 | 33.66 | 32.63 | 30.64 | 24.80 | 13.59 | 26.92 | 43.19 | 43.24 | 43.46 | 37.81 | 97.75 |  |  |



**Table S13.** Pairwise identities of the RdRp amino acid sequences of '*Phytophthora palustris*' toti-like viruses.

|                | PpaTLV<br>12-1 | PpaTLV<br>12-2 | PpaTLV<br>12-3 | PpaTL<br>V4 | PpaTL<br>V7 | PpaTL<br>V8 | PpaTL<br>V3-1 | PpaTL<br>V3-2 | PpaTL<br>V3-3 | PpaTL<br>V10 | PpaTL<br>V6 | PpaTV<br>L11 | PpaTL<br>V1 | PpaTL<br>V2-1 | PpaTL<br>V2-2 | PpaTL<br>V2-3 | PpaTL<br>V9 | PpaTL<br>V5-1 | PpaTL<br>V5-2 |
|----------------|----------------|----------------|----------------|-------------|-------------|-------------|---------------|---------------|---------------|--------------|-------------|--------------|-------------|---------------|---------------|---------------|-------------|---------------|---------------|
| PpaTLV<br>12-1 |                |                |                |             |             |             |               |               |               |              |             |              |             |               |               |               |             |               |               |
| PpaTLV<br>12-2 | 95.58          |                |                |             |             |             |               |               |               |              |             |              |             |               |               |               |             |               |               |
| PpaTLV<br>12-3 | 95.04          | 98.39          |                |             |             |             |               |               |               |              |             |              |             |               |               |               |             |               |               |
| PpaTLV<br>4    | 11.44          | 11.09          | 10.92          |             |             |             |               |               |               |              |             |              |             |               |               |               |             |               |               |
| PpaTLV<br>7    | 10.38          | 10.38          | 10.26          | 86.06       |             |             |               |               |               |              |             |              |             |               |               |               |             |               |               |
| PpaTLV<br>8    | 11.64          | 11.49          | 11.34          | 86.65       | 96.73       |             |               |               |               |              |             |              |             |               |               |               |             |               |               |
| PpaTLV<br>3-1  | 10.41          | 10.30          | 10.52          | 12.52       | 10.20       | 12.36       |               |               |               |              |             |              |             |               |               |               |             |               |               |
| PpaTLV<br>3-2  | 10.85          | 10.74          | 10.85          | 13.04       | 10.88       | 13.29       | 92.20         |               |               |              |             |              |             |               |               |               |             |               |               |
| PpaTLV<br>3-3  | 10.29          | 10.18          | 10.40          | 13.04       | 10.42       | 12.82       | 93.34         | 94.08         |               |              |             |              |             |               |               |               |             |               |               |
| PpaTLV<br>10   | 10.53          | 10.85          | 10.64          | 12.84       | 11.58       | 13.88       | 14.61         | 14.81         | 15.14         |              |             |              |             |               |               |               |             |               |               |
| PpaTLV<br>6    | 11.10          | 10.88          | 10.78          | 14.78       | 12.29       | 15.79       | 14.31         | 14.08         | 14.19         | 22.25        |             |              |             |               |               |               |             |               |               |
| PpaTVL<br>11   | 11.10          | 10.79          | 10.79          | 14.76       | 11.78       | 15.37       | 13.72         | 14.03         | 13.92         | 28.00        | 24.58       |              |             |               |               |               |             |               |               |
| PpaTLV<br>1    | 12.28          | 12.06          | 11.84          | 13.84       | 12.02       | 15.06       | 15.82         | 16.15         | 15.92         | 30.00        | 27.86       | 35.11        |             |               |               |               |             |               |               |
| PpaTLV<br>2-1  | 12.75          | 12.42          | 12.42          | 15.68       | 13.63       | 16.50       | 15.25         | 15.59         | 15.47         | 29.21        | 28.40       | 32.65        | 48.84       |               |               |               |             |               |               |
| PpaTLV<br>2-2  | 12.69          | 12.32          | 12.32          | 15.76       | 13.80       | 16.46       | 15.77         | 16.26         | 16.02         | 28.46        | 29.19       | 33.11        | 50.07       | 95.32         |               |               |             |               |               |
| PpaTLV<br>2-3  | 12.68          | 12.32          | 12.32          | 15.76       | 13.80       | 16.46       | 15.65         | 16.13         | 15.89         | 28.45        | 29.31       | 33.10        | 50.06       | 95.44         | 99.49         |               |             |               |               |
| PpaTLV<br>9    | 10.79          | 11.20          | 11.20          | 14.18       | 11.47       | 14.72       | 14.78         | 15.20         | 15.10         | 27.11        | 25.40       | 27.97        | 31.30       | 31.22         | 31.95         | 31.94         |             |               |               |

|            |       |       |       |       |       |       |       |       |       |       |       |       |       |       |       |       |       |       |
|------------|-------|-------|-------|-------|-------|-------|-------|-------|-------|-------|-------|-------|-------|-------|-------|-------|-------|-------|
| PpaTLV 5-1 | 11.97 | 11.86 | 11.86 | 14.10 | 12.17 | 14.67 | 15.23 | 16.13 | 15.68 | 27.29 | 26.63 | 27.90 | 32.87 | 36.50 | 36.74 | 36.73 | 32.58 |       |
| PpaTLV 5-2 | 12.56 | 12.56 | 12.56 | 13.94 | 12.06 | 14.38 | 15.90 | 16.97 | 16.61 | 26.27 | 27.10 | 28.79 | 34.29 | 37.19 | 37.47 | 37.47 | 33.52 | 89.19 |

**Table S14.** Pairwise identities of the CP amino acid sequences of '*Phytophthora palustris*' toti-like viruses.

|             | PpaT LV8 | PpaTL V3-1 | PpaTL V3-2 | PpaTL V3-3 | PpaTLV 12-1 | PpaTLV 12-2 | PpaTLV 12-3 | PpaT LV7 | PpaT LV6 | PpaTL V5-1 | PpaTL V5-2 | PpaT LV9 | PpaTL V10 | PpaTL V11 | PpaTL V1-1 | PpaTL V1-2 | PpaTL V2-1 | PpaTL V2-2 | PpaTL V2-3 |
|-------------|----------|------------|------------|------------|-------------|-------------|-------------|----------|----------|------------|------------|----------|-----------|-----------|------------|------------|------------|------------|------------|
| PpaTLV 8    |          |            |            |            |             |             |             |          |          |            |            |          |           |           |            |            |            |            |            |
| PpaTLV 3-1  | 6.89     |            |            |            |             |             |             |          |          |            |            |          |           |           |            |            |            |            |            |
| PpaTLV 3-2  | 6.89     | 97.22      |            |            |             |             |             |          |          |            |            |          |           |           |            |            |            |            |            |
| PpaTLV 3-3  | 6.89     | 97.95      | 97.95      |            |             |             |             |          |          |            |            |          |           |           |            |            |            |            |            |
| PpaTLV 12-1 | 8.21     | 7.20       | 7.58       | 7.33       |             |             |             |          |          |            |            |          |           |           |            |            |            |            |            |
| PpaTLV 12-2 | 7.88     | 7.35       | 7.72       | 7.48       | 87.55       |             |             |          |          |            |            |          |           |           |            |            |            |            |            |
| PpaTLV 12-3 | 7.98     | 7.11       | 7.48       | 7.23       | 87.81       | 97.37       |             |          |          |            |            |          |           |           |            |            |            |            |            |
| PpaTLV 7    | 7.84     | 7.26       | 6.93       | 7.04       | 7.38        | 7.84        | 7.82        |          |          |            |            |          |           |           |            |            |            |            |            |
| PpaTLV 6    | 10.08    | 9.07       | 9.19       | 8.95       | 9.38        | 9.54        | 9.51        | 10.53    |          |            |            |          |           |           |            |            |            |            |            |
| PpaTLV 5-1  | 9.51     | 9.43       | 9.69       | 9.43       | 9.16        | 9.31        | 9.40        | 9.13     | 18.57    |            |            |          |           |           |            |            |            |            |            |
| PpaTLV 5-2  | 9.39     | 9.69       | 9.94       | 9.69       | 9.78        | 9.93        | 9.89        | 8.91     | 18.70    | 95.05      |            |          |           |           |            |            |            |            |            |
| PpaTLV 9    | 8.53     | 10.55      | 10.55      | 10.67      | 10.16       | 10.46       | 10.66       | 10.67    | 17.40    | 22.56      | 23.08      |          |           |           |            |            |            |            |            |
| PpaTLV 10   | 10.32    | 10.51      | 10.76      | 10.51      | 8.54        | 9.34        | 9.55        | 10.09    | 17.80    | 22.05      | 22.31      | 22.14    |           |           |            |            |            |            |            |

|               |       |       |       |       |       |       |       |       |       |       |       |       |       |       |        |       |       |       |
|---------------|-------|-------|-------|-------|-------|-------|-------|-------|-------|-------|-------|-------|-------|-------|--------|-------|-------|-------|
| PpaTLV<br>11  | 8.88  | 10.17 | 10.42 | 10.29 | 11.30 | 11.22 | 11.30 | 10.88 | 20.63 | 23.49 | 24.01 | 26.51 | 30.36 |       |        |       |       |       |
| PpaTLV<br>1-1 | 10.01 | 11.65 | 11.90 | 11.65 | 11.23 | 11.64 | 11.60 | 12.40 | 19.43 | 24.49 | 24.75 | 25.77 | 29.45 | 32.09 |        |       |       |       |
| PpaTLV<br>1-2 | 10.01 | 11.65 | 11.90 | 11.65 | 11.23 | 11.64 | 11.60 | 12.40 | 19.43 | 24.49 | 24.75 | 25.77 | 29.45 | 32.09 | 100.00 |       |       |       |
| PpaTLV<br>2-1 | 8.99  | 10.63 | 10.50 | 10.50 | 11.84 | 12.48 | 12.56 | 11.80 | 18.27 | 25.48 | 25.48 | 24.11 | 29.13 | 30.99 | 39.36  | 39.36 |       |       |
| PpaTLV<br>2-2 | 9.23  | 10.88 | 10.75 | 10.75 | 11.59 | 12.24 | 12.32 | 11.69 | 18.27 | 24.97 | 24.97 | 23.98 | 29.39 | 30.87 | 39.74  | 39.74 | 96.55 |       |
| PpaTLV<br>2-3 | 9.23  | 11.00 | 10.88 | 10.88 | 11.59 | 12.24 | 12.32 | 11.69 | 18.27 | 25.22 | 25.22 | 23.98 | 29.39 | 30.87 | 39.87  | 39.87 | 96.29 | 99.36 |

**Table S15.** Average pairwise (PW) identity of the alignment of the partial viral sequences (variants) obtained by RT-PCR with the virus contig sequences obtained by NGS

| 'Phytophthora palustris' virus | PW Identity (%) | Hosts of the virus variants                                                                    |
|--------------------------------|-----------------|------------------------------------------------------------------------------------------------|
| Botybirna-like 1               | 87.6            | SU1474, SU0158, SU0376                                                                         |
| Botybirna-like 2               | 99.7            | KA0139, KA0146, KA0156, KA0119                                                                 |
| Bunya-like 1                   | 100.0           | SU0043                                                                                         |
| Bunya-like 2                   | 99.7            | SU0043, SU0315, SU0317                                                                         |
| Bunya-like 3                   | 99.9            | SU0696, SU0431, SU0376, SU0575                                                                 |
| Bunya-like 4                   | 88.4            | SU0401, SU0361bTRUE, SU0376                                                                    |
| Bunya-like 5                   | 100.0           | SU0399                                                                                         |
| Bunya-like 6                   | 100.0           | SU0409                                                                                         |
| Bunya-like 7                   | 99.9            | SU0264, SU0401                                                                                 |
| Bunya-like 8                   | 98.8            | SU0399                                                                                         |
| Bunya-like 9                   | 87.7            | SU0344, SU0376, SU0656, SU0141                                                                 |
| Bunya-like 10                  | 99.3            | SU0095, SU0696, SU0618                                                                         |
| Bunya-like 11_NC               | 100.0           | SU1474                                                                                         |
| Bunya-like 11_RdRp             | 99.5            | SU1474, SU0250, SU0344, SU0376, SU0656                                                         |
| Bunya-like 12                  | 99.7            | KA0106                                                                                         |
| Bunya-like 13                  | 90.8            | KA0187, KA0106, KA0142                                                                         |
| Narna-like 1                   | 100             | SU0046                                                                                         |
| Narna-like 2                   | 99.4            | SU0095, SU0135, SU0158, SU0344, SU0401, SU0531, SU0696                                         |
| Narna-like 3                   | 94.3            | KA0106, KA0120, SU0135, SU0158, SU0401                                                         |
| Narna-like 4                   | 99.9            | SU0325, SU0317, SU0318                                                                         |
| Narna-like 5                   | 100.0           | SU0696                                                                                         |
| Narna-like 6                   | 99.9            | SU1474                                                                                         |
| Narna-like 7                   | 99.9            | KA0119, KA0156, KA0139, KA0146                                                                 |
| Narna-like 8                   | 95.6            | KA0120                                                                                         |
| Tombus-like 1                  | 99.8            | SU0043, SU0317                                                                                 |
| Toti-like 1                    | 99.7            | KA0119, KA0156, KA0139, KA0146                                                                 |
| Toti-like 2                    | 90.7            | KA0156, KA0139, KA0147                                                                         |
| Toti-like 3                    | 90.2            | KA0092, KA0119, KA0156, KA0139, KA0146                                                         |
| Toti-like 4                    | 100.0           | SU0376                                                                                         |
| Toti-like 5                    | 90.9            | KA0119, KA0139, KA0146, SU0777, SU0875, SU0987, SU1474, SU1477                                 |
| Toti-like 6                    | 99.9            | KA0119, KA0156, KA0139, KA0146                                                                 |
| Toti-like 7                    | 99.8            | KA0119, KA0156, KA0139, KA0146                                                                 |
| Toti-like 8                    | 99.4            | KA0119, KA0156, KA0139, KA0146                                                                 |
| Toti-like 9                    | 99.9            | KA0119, KA0156, KA0139, KA0146                                                                 |
| Toti-like 10                   | 99.9            | KA0119, KA0139, KA0146                                                                         |
| Toti-like 11                   | 99.9            | KA0046, KA0052, KA0059, KA0081, KA0092, KA0102, KA0116, KA0119, KA0120, KA0139, KA0146, KA0156 |
| Toti-like 12                   | 91.7            | KA0146, KA0156, SU0015, SU0235, SU0982, SU1474                                                 |
